# Supplementary material for: Comparative transcriptome analysis reveals different strategies for degradation of steam-exploded sugarcane bagasse by Aspergillus niger and Trichoderma reesei
Source: BMC Genomics. 2017 Jun 30;18:501. doi: 10.1186/s12864-017-3857-5 (PMC5493111; doi:10.1186/s12864-017-3857-5)
Supplement: Supplementary file 6 — Predicted orthologues of genes coding CAZymes upregulated in both A. niger N402 and T. reesei RUT-C30 transcriptomes. (XLSX 14 kb) [file 12864_2017_3857_MOESM6_ESM.xlsx]

## Sheet: Additional file 6
Additional file 6: Predicted orthologs of genes coding CAZymes up regulated in both A. niger N402 and T. reesei RUT-C30 transcriptomes.
* The Aspergillus Genome Database and Trichoderma reesei RUT C30 v1.0 database from JGI were used to recover the A. niger and T. reesei proteins ID, respectively.
£ The color gradient shows the gene expression values. Lighter and darker green have the smallest and biggest values of log₂FC, respectively.
Ortholog group	IDs*	Description	Gene name	CAZy family	log₂FC£
					B6h	B12h	B24h
1	An15g02300	α-arabinofuranosidase	abfB	GH54, CBM42	6.03835	3.80581	1.0262
	102517	α-L-arabinofuranosidase I	abf1	GH54, CBM42	2.55451	1.51421	-
2	An14g05800	α-glucuronidase	aguA	GH67	7.51209	5.50013	4.83096
	90302	α-Glucuronidase	glr1	GH67	6.95977	7.33079	7.61985
3	An01g01870	Xyloglucan active endoglucanase	eglC	GH74, CBM1	1.67215	1.66707	-
	111943	Xyloglucanase	cel74a	GH74, CBM1	2.04207	2.1836	3.86807
4	An03g00960	Arabinoxylan arabinofuranohydrolase	axhA	GH62	7.52295	6.17657	4.94837
	118070	Candidate α-L-arabinofuranosidase	abf2	GH62	5.87522	4.90427	7.02967
5	An14g02760	Endoglucanase	eglA	GH12	9.02037	7.57706	4.78261
	124438	Endo-β-1,4-glucanase	egl3/cel12a	GH12	1.73667	5.38266	8.96277
6	An03g03740	β-glucosidase	bgl4	GH1	2.81766	1.87181	-
	127115	β-glucosidase	bgl2/cel1a	GH1	3.77684	4.57287	5.95527
7	An18g03570	β-glucosidase	bglA	GH3	6.38375	5.71527	4.59644
	25095	Candidate β-glucosidase	cel3b	GH3	-	-	1.10132
8	An01g00780	Endoxylanase	xynB	GH11	9.42364	7.71201	6.20848
	124931	Endo-β-1,4-xylanase	xyn2	GH11	6.38178	7.55661	8.90557
9	An01g09960	β-xylosidase	xlnD	GH3	8.23815	6.05012	4.46785
	140746	β-xylosidase	bxl1	GH3	7.83664	7.5694	8.24515
	74129	Candidate β-xylosidase	xyl3b	GH3	2.12068	2.69892	1.98543
10	An12g04610	Lytic polysaccharide monooxygenase	-	AA9	8.48996	8.3462	4.8211
	An14g02670	Lytic polysaccharide monooxygenase	-	AA9, CBM1	1.71054	-	-
	139633	Lytic polysaccharide monooxygenase	cel61a/egl4	AA9, CBM1	3.84295	6.09552	8.59373
11	An11g00200	β-glucosidase	-	GH3	7.4448	6.38318	6.21261
	An14g01770	β-glucosidase	-	GH3	1.77705	1.24428	-
	74305	Candidate β-glucosidase	cel3e	GH3	1.31423	1.36391	1.51325
12	An08g01760	Cellobiohydrolase	-	GH6	9.033	7.96864	5.43151
	An12g02220	Cellobiohydrolase	-	GH6, CBM1	11.5914	10.7605	7.40036
	122470	Cellobiohydrolase	cbh2/cel6a	GH6, CBM1	2.73053	5.28017	8.23611
13	An17g00520	β-glucosidase	-	GH3	5.69113	4.42513	1.6722
	125268	Candidate β-glucosidase	cel3c	GH3	2.35167	3.21353	4.31315
	122639	Candidate β-glucosidase	cel3d	GH3	3.22653	4.17113	5.76059
14	An07g08940	Cellulose-binding GDSL lipase/acylhydrolase	-	CE16	6.72574	5.20918	3.93822
	136770	Acetyl esterase	aes1	CE16	6.3339	7.50145	7.73769
	5643	Candidate acetyl esterase	-	CE16	1.30003	1.4474	1.0659
15	An02g00140	β-xylosidase	-	GH43	4.40589	3.38947	4.1365
	An08g01900	β xylosidase	-	GH43	5.43207	4.17478	4.71017
	77521	Candidate β-xylosidase/α-L-arabinofuranosidase	-	GH43	4.20715	4.7555	5.30658
16	An01g11670	Endoglucanase	-	GH5, CBM1	8.00221	6.47868	4.22416
	An07g08950	Endoglucanase	eglC	GH5	5.45892	4.2167	2.19199
	72489	Endo-β-1,4-glucanase	egl2/cel5a	GH5, CBM1	3.26805	5.73884	8.57439
17	An01g11660	Cellobiohydrolase	cbhB	GH7, CBM1	8.45386	6.6884	3.07677
	An07g09330	Cellobiohydrolase	cbhA	GH7	4.35728	4.71045	-
	125125	Cellobiohydrolase	cbh1/cel7a	GH7, CBM1	3.49087	5.83556	8.74755
