# Supplementary material for: Comparative transcriptome analysis reveals different strategies for degradation of steam-exploded sugarcane bagasse by Aspergillus niger and Trichoderma reesei
Source: BMC Genomics. 2017 Jun 30;18:501. doi: 10.1186/s12864-017-3857-5 (PMC5493111; doi:10.1186/s12864-017-3857-5)
Supplement: Supplementary file 7 — Transcriptional profile of main CAZy families related to lignocellulose degradation. (XLSX 444 kb) [file 12864_2017_3857_MOESM7_ESM.xlsx]

## Sheet: Additional file 7
Additional file 7: Transcriptional profile of main CAZy families related to lignocellulose degradation.
		Fold Change (bagasse/frutose)
		6h	12h	24h
AA9	T. reesei	11.8539	80.8283	465.114
	A. niger	82.8737	106.733	19.0585
CE11	A. niger	163.766	98.9409	44.4547
CE32	T. reesei	5.03931	5.79822	4.48314
CE5	T. reesei	25.0667	76.3848	521.997
	A. niger	5.70589	5.19837	2.90957
CE16	T. reesei	41.5644	91.964	107.767
	A. niger	105.84	36.9931	15.3293
GH1	T. reesei	8.56721	14.5713	34.5738
	A. niger	69.7479	23.4039	33.7501
GH10	T. reesei	6.47534	27.4916	369.428
	A. niger	239.031	83.4171	32.0293
GH11	T. reesei	44.6626	87.6549	199.269
	A. niger	407.933	135.298	34.9289
GH1153	T. reesei	-	2.15259	-
GH12	T. reesei	3.33264	41.7197	498.958
	A. niger	44.5611	21.6304	9.19559
GH3	T. reesei	37.0005	35.5929	70.3631
	A. niger	79.5189	34.4509	18.0936
GH43	T. reesei	18.4705	27.0116	39.5767
	A. niger	77.3012	54.5908	26.8112
GH453	T. reesei	7.74949	42.4147	366.733
GH5	T. reesei	7.69307	41.1998	409.492
	A. niger	55.7488	36.7297	14.9287
GH514	A. niger	24.3928	13.3104	15.0836
GH54	T. reesei	5.87469	2.85643	-
	A. niger	65.7242	13.985	2.03665
GH6	T. reesei	6.637	38.8588	301.521
	A. niger	1804.81	992.599	106.048
GH62	T. reesei	58.6972	29.9455	130.66
	A. niger	183.922	72.3326	30.875
GH67	T. reesei	124.48	160.986	196.7
	A. niger	182.542	45.2588	28.4619
GH7	T. reesei	8.70697	45.1338	383.191
	A. niger	185.569	64.6582	8.43722
GH74	T. reesei	4.11837	4.54286	14.6017
	A. niger	3.18688	3.17569	-
1 up regulated only in A. niger
2 up regulated only in T. reesei
3 Present only in T. reesei genome
4 Present only in A. niger genome
